# Supplementary material for: Pesticide transport through the vadose zone under sugarcane in the Wet Tropics, Australia
Source: Copernicus journal article supplement (doi:10.5194/soil-9-381-2023), 2023-07-05
Supplement: Supplementary file 1 [file soil-9-381-2023-supplement.pdf]

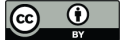

*Supplement of*

## **Pesticide transport through the vadose zone under sugarcane in the Wet Tropics, Australia**

**Rezaul Karim et al.**

*Correspondence to:* Lucy Reading ([lucy.reading@qut.edu.au](mailto:lucy.reading@qut.edu.au))

The copyright of individual parts of the supplement might differ from the article licence.

## Supplementary data

Table S1.: the pesticide and their residues in monitoring boreholes surrounding the catchment

| Herbicides in water           | Health value | Units | Reporting Limit | Monitoring Bores (RN...) |          |          |          |          |          |
|-------------------------------|--------------|-------|-----------------|--------------------------|----------|----------|----------|----------|----------|
|                               |              |       |                 | 11210004                 | 11210029 | 11210032 | 11210041 | 11210051 | 11210056 |
| Glyphosate                    | 1000         | µg/L  | 0.70            | <                        | <        | <        | <        | <        | <        |
| Fluroxypyr                    |              | µg/L  | 0.01            | <                        | <        | <        | <        | <        | <        |
| Imazapic                      |              | µg/L  | 0.01            | <                        | <        | <        | <        | <        | 0.70     |
| Imidacloprid                  |              | µg/L  | 0.02            | <                        | <        | 0.60     | <        | 0.08     | <        |
| Isoxaflutole metabolite (DKN) |              | µg/L  | 0.02            | <                        | <        | <        | <        | <        | <        |
| Metolachlor                   | 300          | µg/L  | 0.005           | <                        | <        | <        | <        | <        | <        |
| Haloxyfop                     | 1            | µg/L  | 0.02            | <                        | <        | <        | <        | <        | <        |

Table S2.: the pesticide and their residues in vadose water through the vadose zone (November 2017)

| Herbicides in water           | Health value | Units | Reporting Limit | Vadose zone, VSP |       |       |       |       |       |       |       |   |
|-------------------------------|--------------|-------|-----------------|------------------|-------|-------|-------|-------|-------|-------|-------|---|
|                               |              |       |                 | 1.15m            | 1.56m | 1.97m | 2.46m | 2.87m | 3.28m | 3.69m | 4.00m |   |
| Glyphosate                    | 1000         | µg/L  | 0.70            | <                | <     | <     | <     | <     | <     | <     | <     | < |
| Fluroxypyr                    |              | µg/L  | 0.01            | <                | <     | <     | <     | <     | <     | <     | <     | < |
| Imazapic                      |              | µg/L  | 0.01            | <                | <     | <     | <     | <     | <     | <     | <     | < |
| Imidacloprid                  |              | µg/L  | 0.02            | 0.11             | 0.09  | 0.06  | 0.02  | <     | <     | 0.03  | 0.02  |   |
| Isoxaflutole metabolite (DKN) |              | µg/L  | 0.02            | <                | <     | <     | <     | <     | <     | <     | <     | < |
| Metolachlor                   | 300          | µg/L  | 0.005           | <                | <     | <     | <     | <     | <     | <     | <     | < |
| Haloxyfop                     | 1            | µg/L  | 0.02            | <                | <     | <     | <     | <     | <     | <     | <     | < |

Table S3.: the pesticide and their residues in vadose water through the vadose zone (January 2018)

| Herbicides in water           | Health value | Units | Reporting Limit | Vadose zone, VSP |       |       |       |       |       |       |       |   |
|-------------------------------|--------------|-------|-----------------|------------------|-------|-------|-------|-------|-------|-------|-------|---|
|                               |              |       |                 | 1.15m            | 1.56m | 1.97m | 2.46m | 2.87m | 3.28m | 3.69m | 4.00m |   |
| Glyphosate                    | 1000         | µg/L  | 0.70            | <                | <     | <     | <     | <     | <     | <     | <     | < |
| Fluroxypyr                    |              | µg/L  | 0.01            | 4.7              | 0.90  | 0.58  | 0.18  | 0.14  |       | <     | <     | < |
| Imazapic                      |              | µg/L  | 0.01            | <                | <     | <     | <     | <     | <     | <     | <     | < |
| Imidacloprid                  |              | µg/L  | 0.02            | 0.07             | 0.04  | <     | <     | <     | <     | <     | <     | < |
| Isoxaflutole metabolite (DKN) |              | µg/L  | 0.02            | <                | <     | <     | <     | <     | <     | <     | <     | < |
| Metolachlor                   | 300          | µg/L  | 0.005           | <                | <     | <     | <     | <     | <     | <     | <     | < |
| Haloxyfop                     | 1            | µg/L  | 0.02            | <                | <     | <     | <     | <     | <     | <     | <     | < |

**Table S4: the pesticide and their residues in vadose water through the vadose zone (May 2018)**

| Herbicides in water           | Health value | Units | Reporting Limit | Vadose zone, VSP |       |       |       |       |       |       |       |   |
|-------------------------------|--------------|-------|-----------------|------------------|-------|-------|-------|-------|-------|-------|-------|---|
|                               |              |       |                 | 1.15m            | 1.56m | 1.97m | 2.46m | 2.87m | 3.28m | 3.69m | 4.00m |   |
| Glyphosate                    | 1000         | µg/L  | 0.70            | <                | <     | <     | <     | <     | <     | <     | <     | < |
| Fluroxypyr                    |              | µg/L  | 0.01            | 0.07             |       |       | <     |       |       | <     | <     | < |
| Imazapic                      |              | µg/L  | 0.01            | <                | <     | <     | <     | <     | <     | <     | <     | < |
| Imidacloprid                  |              | µg/L  | 0.02            | 0.04             | 0.02  | 0.06  |       | 0.02  |       |       |       |   |
| Isoxaflutole metabolite (DKN) |              | µg/L  | 0.02            | <                | <     | <     | <     | <     | <     | <     | <     | < |
| Metolachlor                   | 300          | µg/L  | 0.005           | <                | <     | <     | <     | <     | <     | <     | <     | < |
| Haloxyfop                     | 1            | µg/L  | 0.02            | <                | <     | <     | <     | <     | <     | <     | <     | < |

**Table S5.: the pesticide and their residues in vadose water through the vadose zone (November 2018)**

| Herbicides in water           | Health value | Units | Reporting Limit | Vadose zone, VSP |       |       |       |       |       |       |       |   |
|-------------------------------|--------------|-------|-----------------|------------------|-------|-------|-------|-------|-------|-------|-------|---|
|                               |              |       |                 | 1.15m            | 1.56m | 1.97m | 2.46m | 2.87m | 3.28m | 3.69m | 4.00m |   |
| Glyphosate                    | 1000         | µg/L  | 0.70            | <                | <     | <     | <     | <     | <     | <     | <     | < |
| Fluroxypyr                    |              | µg/L  | 0.01            | <                | <     | <     | <     | <     | <     | <     | <     | < |
| Imazapic                      |              | µg/L  | 0.01            | <                | <     | <     | <     | <     | <     | <     | <     | < |
| Imidacloprid                  |              | µg/L  | 0.02            | 0.03             | <     | <     | <     | <     | <     | <     | <     | < |
| Isoxaflutole metabolite (DKN) |              | µg/L  | 0.02            | <                | 2.2   | <     | 2.2   | <     | 1.4   | <     | <     | < |
| Metolachlor                   | 300          | µg/L  | 0.005           | <                | <     | <     | <     | <     | <     | <     | <     | < |
| Haloxyfop                     | 1            | µg/L  | 0.02            | <                | <     | <     | <     | <     | <     | <     | <     | < |

**Table S6.: the pesticide and their residues in vadose water through the vadose zone (December 2019)**

| Herbicides in water           | Health value | Units | Reporting Limit | Vadose zone, VSP |       |       |       |       |       |       |       |   |
|-------------------------------|--------------|-------|-----------------|------------------|-------|-------|-------|-------|-------|-------|-------|---|
|                               |              |       |                 | 1.15m            | 1.56m | 1.97m | 2.46m | 2.87m | 3.28m | 3.69m | 4.00m |   |
| Glyphosate                    | 1000         | µg/L  | 0.70            | <                | <     | <     | <     | <     | <     | <     | <     | < |
| Fluroxypyr                    |              | µg/L  | 0.01            | <                | <     | <     | <     | <     | <     | <     | <     | < |
| Hexazinone                    | 400          | µg/L  | 0.01            | <                | <     | <     | <     | <     | <     | <     | <     | < |
| Imazapic                      |              | µg/L  | 0.01            | <                | <     | <     | <     | <     | <     | <     | <     | < |
| Imidacloprid                  |              | µg/L  | 0.02            | <                | <     | <     | <     | <     | <     | <     | <     | < |
| Isoxaflutole metabolite (DKN) |              | µg/L  | 0.02            | <                | 0.02  | <     | <     | <     | <     | <     | <     | < |
| Metolachlor                   | 300          | µg/L  | 0.005           | <                | <     | <     | <     | <     | <     | <     | <     | < |
| Haloxyfop                     | 1            | µg/L  | 0.02            | <                | <     | <     | <     | <     | <     | <     | <     | < |

Table S7.: the pesticide and their residues in the monitoring bores at the site

| Herbicides in water           | Health value | Units | Reporting Limit | November, 2017 |        | January, 2018 |        | May, 2018 |        | November, 2018 |        | December 2019 |        |
|-------------------------------|--------------|-------|-----------------|----------------|--------|---------------|--------|-----------|--------|----------------|--------|---------------|--------|
|                               |              |       |                 | 183021         | 183022 | 183021        | 183022 | 183021    | 183022 | 183021         | 183022 | 183021        | 183022 |
| Glyphosate                    | 1000         | µg/L  | 0.70            | <              | <      | <             | <      | <         | <      | <              | <      | <             | <      |
| Fluroxypyr                    |              | µg/L  | 0.01            | <              | <      | <             | <      | <         | <      | <              | <      | <             | <      |
| Hexazinone                    | 400          | µg/L  | 0.01            | <              | <      | <             | <      | <         | <      | <              | <      | <             | <      |
| Imazapic                      |              | µg/L  | 0.01            | <              | <      | <             | <      | <         | <      | <              | <      | <             | <      |
| Imadacloprid                  |              | µg/L  | 0.02            | <              | <      | <             | <      | <         | <      | <              | <      | <             | <      |
| Isoxaflutole metabolite (DKN) |              | µg/L  | 0.02            | <              | <      | <             | <      | <         | <      | <              | <      | <             | <      |
| Metolachlor                   | 300          | µg/L  | 0.005           | <              | <      | <             | <      | <         | <      | <              | <      | <             | <      |
| Haloxypop                     | 1            | µg/L  | 0.02            | <              | <      | <             | <      | <         | <      | <              | <      | <             | <      |

Table S8.: the pesticide and their residues in soil (September and November 2018)

| Herbicides in water           | Health value | Units | Reporting Limit | September, 2018 |       |       | November, 2018 |       |       |
|-------------------------------|--------------|-------|-----------------|-----------------|-------|-------|----------------|-------|-------|
|                               |              |       |                 | 25 cm           | 35 cm | 50 cm | 25 cm          | 35 cm | 50 cm |
| Glyphosate                    | 1000         | mg/Kg | 0.70            | <               | <     | <     | <              | <     | <     |
| Fluroxypyr                    |              | mg/Kg | 0.01            | <               | <     | <     | <              | <     | <     |
| Hexazinone                    | 400          | mg/Kg | 0.01            | <               | <     | <     | <              | <     | <     |
| Imazapic                      |              | mg/Kg | 0.01            | <               | <     | <     | <              | <     | <     |
| Imadacloprid                  |              | mg/Kg | 0.02            | <               | <     | <     | <              | <     | <     |
| Isoxaflutole metabolite (DKN) |              | mg/Kg | 0.02            | <               | <     | <     | <              | <     | <     |
| Metolachlor                   | 300          | mg/Kg | 0.005           | <               | <     | <     | <              | <     | <     |
| Haloxypop                     |              | mg/Kg | 0.001           | <               | <     | <     | <              | <     | <     |

Table S9.: the pesticide and their residues soil (November and December 2019)

| Herbicides in water           | Health value | Units | Reporting Limit | November 2019 |       |       | December 2019 |       |       |
|-------------------------------|--------------|-------|-----------------|---------------|-------|-------|---------------|-------|-------|
|                               |              |       |                 | 25 cm         | 35 cm | 50 cm | 25 cm         | 35 cm | 50 cm |
| Glyphosate                    | 1000         | mg/Kg | 0.70            | <             | <     | <     | <             | <     | <     |
| Fluroxypyr                    |              | mg/Kg | 0.01            | <             | <     | <     | <             | <     | <     |
| Hexazinone                    | 400          | mg/Kg | 0.01            | <             | <     | <     | <             | <     | <     |
| Imazapic                      |              | mg/Kg | 0.01            | <             | <     | <     | <             | <     | <     |
| Imadacloprid                  |              | mg/Kg | 0.02            | 0.004         | 0.010 | <     | 0.012         | <     | <     |
| Isoxaflutole metabolite (DKN) |              | mg/Kg | 0.02            | <             | <     | <     | <             | <     | <     |
| Metolachlor                   | 300          | mg/Kg | 0.005           | <             | <     | <     | <             | <     | <     |
| Haloxypop                     |              | mg/Kg | 0.001           | <             | <     | <     | 0.004         | 0.010 | 0.002 |

**Table S10.: Water content**

| Date       | 0.74 m | 1.15 m | 1.56 m | 1.97 m | 2.46 m | 2.87 m | 3.28 m | 3.69 m | Rainfall.<br>Mm/day |
|------------|--------|--------|--------|--------|--------|--------|--------|--------|---------------------|
| 1/07/2017  |        |        |        |        |        |        |        |        | 12.6                |
| 2/07/2017  |        |        |        |        |        |        |        |        | 19.6                |
| 3/07/2017  |        |        |        |        |        |        |        |        | 26.6                |
| 4/07/2017  |        |        |        |        |        |        |        |        | 2.4                 |
| 5/07/2017  |        |        |        |        |        |        |        |        | 0                   |
| 6/07/2017  |        |        |        |        |        |        |        |        | 0                   |
| 7/07/2017  |        |        |        |        |        |        |        |        | 0                   |
| 8/07/2017  |        |        |        |        |        |        |        |        | 0                   |
| 9/07/2017  |        |        |        |        |        |        |        |        | 0                   |
| 10/07/2017 |        |        |        |        |        |        |        |        | 2.4                 |
| 11/07/2017 |        |        |        |        |        |        |        |        | 0.2                 |
| 12/07/2017 |        |        |        |        |        |        |        |        | 0.6                 |
| 13/07/2017 |        |        |        |        |        |        |        |        | 1.2                 |
| 14/07/2017 | 41.53  | 40.04  | 52.44  | 39.90  | 31.48  | 32.55  | 44.94  | 42.62  | 2.4                 |
| 15/07/2017 | 41.00  | 40.16  | 51.60  | 40.19  | 31.25  | 34.61  | 45.13  | 42.59  | 1.6                 |
| 16/07/2017 | 39.00  | 40.66  | 51.29  | 40.86  | 31.55  | 35.32  | 45.51  | 42.70  | 0.4                 |
| 17/07/2017 | 35.75  | 40.67  | 51.47  | 41.61  | 32.03  | 35.45  | 45.73  | 42.77  | 0                   |
| 18/07/2017 | 34.34  | 40.74  | 51.59  | 41.96  | 32.62  | 35.63  | 45.75  | 42.74  | 0                   |
| 19/07/2017 | 33.58  | 40.62  | 51.67  | 42.06  | 33.06  | 35.79  | 45.78  | 42.78  | 0                   |
| 20/07/2017 | 32.95  | 40.45  | 51.78  | 42.14  | 33.35  | 35.96  | 45.84  | 42.81  | 0                   |
| 21/07/2017 | 32.51  | 40.51  | 51.80  | 42.26  | 35.05  | 36.08  | 45.90  | 42.90  | 0                   |
| 22/07/2017 | 32.02  | 40.55  | 51.74  | 42.42  | 35.65  | 36.29  | 46.02  | 43.00  | 0                   |
| 23/07/2017 | 31.70  | 40.71  | 51.70  | 42.48  | 35.70  | 36.47  | 46.08  | 43.05  | 0                   |
| 24/07/2017 | 31.16  | 40.85  | 51.76  | 42.60  | 35.76  | 36.66  | 46.18  | 43.06  | 0                   |
| 25/07/2017 | 30.77  | 40.92  | 51.88  | 42.64  | 35.87  | 36.80  | 46.20  | 43.16  | 4.8                 |
| 26/07/2017 | 30.43  | 40.93  | 51.91  | 42.83  | 35.95  | 36.99  | 46.24  | 43.17  | 0.6                 |
| 27/07/2017 | 30.02  | 40.85  | 52.06  | 42.93  | 36.04  | 37.13  | 46.31  | 43.26  | 0.4                 |
| 28/07/2017 | 29.64  | 41.20  | 52.06  | 43.10  | 36.16  | 37.37  | 46.40  | 43.19  | 1.4                 |
| 29/07/2017 | 29.16  | 41.71  | 52.17  | 42.95  | 36.13  | 37.47  | 46.46  | 43.29  | 0                   |
| 30/07/2017 | 28.65  | 41.65  | 52.16  | 43.05  | 35.68  | 37.64  | 46.49  | 43.32  | 0                   |
| 31/07/2017 | 28.22  | 41.85  | 52.22  | 43.12  | 35.86  | 37.72  | 46.53  | 43.45  | 0.2                 |
| 1/08/2017  | 28.03  | 41.90  | 52.21  | 43.17  | 35.95  | 37.90  | 46.56  | 43.39  | 0.2                 |
| 2/08/2017  | 27.81  | 41.96  | 52.41  | 43.18  | 36.01  | 37.99  | 46.62  | 43.47  | 1.4                 |
| 3/08/2017  | 27.46  | 42.04  | 52.34  | 43.28  | 35.99  | 38.20  | 46.67  | 43.48  | 0.2                 |
| 4/08/2017  | 27.04  | 42.03  | 52.53  | 43.37  | 35.98  | 38.22  | 46.63  | 43.62  | 3.6                 |
| 5/08/2017  | 27.06  | 42.10  | 52.47  | 43.49  | 36.05  | 38.38  | 46.63  | 43.66  | 6.2                 |
| 6/08/2017  | 27.29  | 42.20  | 52.45  | 43.55  | 36.12  | 38.51  | 46.59  | 43.75  | 1.4                 |
| 7/08/2017  | 27.42  | 42.34  | 52.61  | 43.47  | 36.31  | 38.67  | 46.69  | 43.77  | 0                   |
| 8/08/2017  | 27.04  | 42.14  | 52.57  | 43.70  | 36.32  | 38.89  | 46.87  | 43.70  | 0                   |
| 9/08/2017  | 26.96  | 42.13  | 52.72  | 43.74  | 36.44  | 39.00  | 46.91  | 43.75  | 1.4                 |
| 10/08/2017 | 26.87  | 42.17  | 52.75  | 43.78  | 36.54  | 39.14  | 46.92  | 43.77  | 0                   |
| 11/08/2017 | 26.70  | 42.12  | 52.78  | 43.83  | 36.59  | 39.28  | 46.94  | 43.83  | 0                   |
| 12/08/2017 | 26.46  | 42.05  | 52.87  | 43.82  | 36.12  | 39.29  | 47.00  | 43.94  | 0                   |

|            |       |       |       |       |       |       |       |       |       |
|------------|-------|-------|-------|-------|-------|-------|-------|-------|-------|
| 13/08/2017 | 26.37 | 42.03 | 52.82 | 43.91 | 36.07 | 39.43 | 47.03 | 43.85 | 0.2   |
| 14/08/2017 | 26.21 | 42.07 | 52.91 | 43.89 | 36.17 | 39.47 | 47.07 | 43.93 | 1     |
| 15/08/2017 | 26.09 | 42.10 | 52.92 | 43.36 | 36.32 | 39.53 | 47.11 | 43.95 | 0     |
| 16/08/2017 | 25.98 | 42.04 | 52.96 | 43.33 | 36.50 | 39.55 | 47.17 | 43.99 | 0     |
| 17/08/2017 | 25.83 | 42.00 | 53.03 | 43.46 | 36.60 | 39.58 | 47.16 | 44.03 | 0     |
| 18/08/2017 | 25.67 | 42.04 | 53.04 | 43.59 | 36.55 | 39.64 | 47.19 | 44.04 | 0     |
| 19/08/2017 | 25.50 | 42.21 | 53.06 | 43.63 | 36.60 | 39.67 | 47.22 | 44.10 | 0     |
| 20/08/2017 | 25.33 | 42.18 | 53.13 | 43.66 | 36.59 | 39.68 | 47.25 | 44.10 | 0     |
| 21/08/2017 | 25.11 | 42.16 | 53.19 | 43.72 | 36.69 | 39.69 | 47.31 | 44.19 | 0     |
| 22/08/2017 | 24.98 | 42.10 | 53.16 | 43.79 | 36.50 | 39.76 | 47.32 | 44.13 | 0.2   |
| 23/08/2017 | 24.83 | 41.90 | 53.20 | 43.79 | 36.15 | 39.77 | 47.35 | 44.22 | 0     |
| 24/08/2017 | 24.68 | 41.54 | 53.23 | 43.80 | 36.16 | 39.79 | 47.34 | 44.23 | 0     |
| 25/08/2017 | 24.53 | 41.15 | 53.24 | 43.80 | 36.16 | 39.81 | 47.39 | 44.28 | 0     |
| 26/08/2017 | 24.34 | 40.27 | 53.32 | 43.78 | 36.08 | 39.78 | 47.43 | 44.40 | 0     |
| 27/08/2017 | 24.24 | 40.45 | 53.31 | 43.81 | 36.05 | 39.83 | 47.46 | 44.32 | 0     |
| 28/08/2017 | 24.08 | 39.14 | 53.35 | 43.81 | 35.98 | 39.83 | 47.48 | 44.34 | 0     |
| 29/08/2017 | 23.92 | 32.24 | 53.40 | 43.82 | 35.98 | 39.84 | 47.50 | 44.34 | 0     |
| 30/08/2017 | 23.78 | 31.59 | 53.42 | 43.84 | 35.93 | 39.85 | 47.50 | 44.37 | 0     |
| 31/08/2017 | 23.60 | 31.44 | 53.46 | 43.87 | 35.96 | 39.84 | 47.56 | 44.40 | 0.6   |
| 1/09/2017  | 23.37 | 31.38 | 53.54 | 43.84 | 36.09 | 39.82 | 47.57 | 44.42 | 0.2   |
| 2/09/2017  | 23.08 | 31.27 | 53.49 | 43.88 | 35.95 | 39.79 | 47.60 | 44.52 | 0.4   |
| 3/09/2017  | 22.89 | 30.89 | 53.51 | 43.91 | 35.94 | 39.83 | 47.61 | 44.44 | 0.2   |
| 4/09/2017  | 22.57 | 30.28 | 53.55 | 43.91 | 35.88 | 39.80 | 47.60 | 44.45 | 0     |
| 5/09/2017  | 22.25 | 30.15 | 53.49 | 43.94 | 35.87 | 39.78 | 47.61 | 44.46 | 0     |
| 6/09/2017  | 22.02 | 29.78 | 53.50 | 43.91 | 35.72 | 39.74 | 47.63 | 44.49 | 0     |
| 7/09/2017  | 21.84 | 29.47 | 53.51 | 43.91 | 35.81 | 39.72 | 47.65 | 44.52 | 0     |
| 8/09/2017  | 21.63 | 29.20 | 53.58 | 43.90 | 35.88 | 39.66 | 47.66 | 44.51 | 0     |
| 9/09/2017  | 21.41 | 29.12 | 53.59 | 43.90 | 35.74 | 39.64 | 47.68 | 44.55 | 0.2   |
| 10/09/2017 | 21.17 | 29.01 | 53.60 | 43.86 | 35.54 | 39.61 | 47.67 | 44.54 | 0     |
| 11/09/2017 | 20.89 | 28.83 | 53.71 | 43.81 | 35.26 | 39.57 | 47.68 | 44.56 | 0     |
| 12/09/2017 | 20.69 | 28.68 | 53.64 | 43.83 | 34.78 | 39.22 | 47.74 | 44.60 | 0     |
| 13/09/2017 | 20.58 | 28.59 | 53.46 | 43.78 | 34.83 | 39.17 | 47.72 | 44.57 | 0     |
| 14/09/2017 | 20.34 | 28.49 | 53.15 | 44.62 | 35.89 | 39.16 | 47.69 | 44.55 | 0     |
| 15/09/2017 | 20.05 | 28.22 | 53.17 | 44.66 | 35.83 | 39.13 | 47.73 | 44.63 | 0     |
| 16/09/2017 | 19.82 | 27.82 | 53.17 | 44.69 | 35.75 | 39.13 | 47.73 | 44.60 | 0     |
| 17/09/2017 | 19.56 | 27.24 | 53.17 | 44.67 | 35.67 | 39.02 | 47.76 | 44.58 | 0     |
| 18/09/2017 | 19.32 | 26.98 | 53.21 | 44.63 | 35.43 | 38.82 | 47.76 | 44.65 | 10.6  |
| 19/09/2017 | 39.87 | 40.93 | 54.06 | 44.85 | 37.46 | 38.36 | 47.65 | 44.78 | 158.4 |
| 20/09/2017 | 46.49 | 42.83 | 54.85 | 45.94 | 38.63 | 38.56 | 47.83 | 44.73 | 2.4   |
| 21/09/2017 | 46.30 | 42.81 | 54.38 | 45.53 | 38.80 | 37.55 | 47.86 | 44.74 | 0     |
| 22/09/2017 | 45.79 | 42.82 | 54.31 | 44.97 | 37.25 | 35.46 | 47.84 | 44.82 | 0     |
| 23/09/2017 | 46.81 | 42.83 | 54.34 | 44.68 | 37.59 | 34.93 | 47.80 | 44.82 | 0     |
| 24/09/2017 | 46.95 | 42.91 | 54.33 | 44.75 | 37.34 | 35.00 | 47.79 | 44.87 | 0     |
| 25/09/2017 | 47.02 | 42.93 | 54.33 | 44.81 | 36.72 | 35.00 | 47.79 | 44.87 | 0     |
| 26/09/2017 | 47.11 | 42.94 | 54.36 | 44.87 | 35.93 | 35.03 | 47.77 | 44.88 | 0     |
| 27/09/2017 | 47.15 | 42.90 | 54.38 | 44.99 | 35.81 | 35.03 | 47.81 | 44.87 | 0     |

|            |       |       |       |       |       |       |       |       |       |
|------------|-------|-------|-------|-------|-------|-------|-------|-------|-------|
| 28/09/2017 | 45.78 | 42.82 | 54.40 | 44.93 | 35.89 | 35.07 | 47.80 | 44.86 | 0     |
| 29/09/2017 | 35.78 | 42.76 | 54.37 | 44.71 | 37.53 | 35.16 | 47.79 | 44.87 | 0     |
| 30/09/2017 | 29.71 | 42.68 | 54.36 | 44.76 | 38.65 | 35.19 | 47.80 | 44.88 | 0     |
| 1/10/2017  | 27.94 | 42.63 | 54.41 | 44.99 | 39.23 | 35.15 | 47.79 | 44.90 | 0     |
| 2/10/2017  | 26.69 | 42.54 | 54.48 | 45.31 | 38.94 | 35.12 | 47.82 | 44.92 | 0     |
| 3/10/2017  | 25.78 | 42.41 | 54.47 | 45.34 | 38.79 | 35.16 | 47.80 | 44.92 | 0.2   |
| 4/10/2017  | 25.23 | 42.30 | 54.47 | 45.27 | 39.13 | 35.16 | 47.83 | 44.88 | 0     |
| 5/10/2017  | 24.80 | 42.14 | 54.53 | 45.20 | 39.25 | 35.13 | 47.84 | 44.92 | 0     |
| 6/10/2017  | 24.45 | 40.35 | 54.58 | 45.18 | 38.90 | 35.12 | 47.82 | 44.95 | 0     |
| 7/10/2017  | 24.20 | 38.67 | 54.61 | 45.18 | 38.61 | 35.10 | 47.80 | 44.94 | 0     |
| 8/10/2017  | 23.98 | 37.18 | 54.57 | 45.18 | 38.35 | 35.08 | 47.83 | 44.91 | 0     |
| 9/10/2017  | 23.73 | 36.26 | 54.57 | 45.17 | 38.43 | 35.03 | 47.84 | 44.95 | 0     |
| 10/10/2017 | 23.49 | 35.81 | 54.50 | 45.17 | 38.26 | 35.04 | 47.83 | 44.96 | 0     |
| 11/10/2017 | 23.26 | 35.63 | 54.49 | 45.15 | 38.08 | 34.96 | 47.85 | 44.98 | 0     |
| 12/10/2017 | 22.98 | 35.29 | 54.53 | 45.10 | 38.14 | 34.96 | 47.87 | 44.97 | 0     |
| 13/10/2017 | 22.75 | 33.24 | 54.47 | 45.10 | 38.34 | 34.94 | 47.87 | 44.99 | 0     |
| 14/10/2017 | 22.53 | 31.99 | 54.50 | 44.61 | 38.00 | 34.92 | 47.89 | 44.98 | 0     |
| 15/10/2017 | 23.16 | 32.33 | 54.54 | 44.02 | 38.33 | 34.87 | 47.91 | 44.99 | 53    |
| 16/10/2017 | 47.04 | 41.53 | 54.77 | 44.70 | 43.09 | 35.43 | 47.95 | 45.09 | 21.4  |
| 17/10/2017 | 47.49 | 41.61 | 54.90 | 44.96 | 44.95 | 35.23 | 47.91 | 45.17 | 13.8  |
| 18/10/2017 | 48.20 | 41.97 | 55.00 | 45.36 | 45.10 | 35.98 | 47.84 | 45.20 | 212.2 |
| 19/10/2017 | 48.73 | 43.04 | 54.48 | 46.27 | 42.72 | 37.00 | 47.94 | 45.09 | 82.6  |
| 20/10/2017 | 48.45 | 42.89 | 54.82 | 45.92 | 41.10 | 36.25 | 47.92 | 45.20 | 11.8  |
| 21/10/2017 | 48.37 | 42.04 | 55.07 | 45.70 | 41.45 | 35.72 | 48.14 | 45.36 | 5.8   |
| 22/10/2017 | 48.45 | 42.00 | 55.09 | 45.80 | 41.07 | 35.91 | 48.16 | 45.45 | 15.6  |
| 23/10/2017 | 48.53 | 41.88 | 55.15 | 45.91 | 40.94 | 36.13 | 48.18 | 45.35 | 0     |
| 24/10/2017 | 48.58 | 41.67 | 55.18 | 45.84 | 41.14 | 36.12 | 48.23 | 45.32 | 0     |
| 25/10/2017 | 48.56 | 41.54 | 55.16 | 45.89 | 40.84 | 36.13 | 48.19 | 45.32 | 0     |
| 26/10/2017 | 48.50 | 41.51 | 55.14 | 45.92 | 40.54 | 36.14 | 48.20 | 45.33 | 0     |
| 27/10/2017 | 48.40 | 41.49 | 55.14 | 45.92 | 40.32 | 36.16 | 48.22 | 45.36 | 0     |
| 28/10/2017 | 48.36 | 41.46 | 55.18 | 45.91 | 40.07 | 36.16 | 48.22 | 45.38 | 0     |
| 29/10/2017 | 46.06 | 41.35 | 55.23 | 45.86 | 39.98 | 36.14 | 48.28 | 45.34 | 0     |
| 30/10/2017 | 37.04 | 41.23 | 55.21 | 45.76 | 39.97 | 36.10 | 48.26 | 45.35 | 0     |
| 31/10/2017 | 30.09 | 41.08 | 55.25 | 45.67 | 39.81 | 36.07 | 48.23 | 45.39 | 0     |
| 1/11/2017  | 28.04 | 40.91 | 55.22 | 45.65 | 39.64 | 36.03 | 48.23 | 45.37 | 0     |
| 2/11/2017  | 27.10 | 40.28 | 55.20 | 44.93 | 39.75 | 34.79 | 48.21 | 45.41 | 0     |
| 3/11/2017  | 26.53 | 39.74 | 55.30 | 44.94 | 39.45 | 33.62 | 48.11 | 45.41 | 0     |
| 4/11/2017  | 26.20 | 39.58 | 55.32 | 45.00 | 39.34 | 33.56 | 48.14 | 45.45 | 0     |
| 5/11/2017  | 25.89 | 39.51 | 55.34 | 44.93 | 39.11 | 33.48 | 48.17 | 45.44 | 0     |
| 6/11/2017  | 25.71 | 39.36 | 55.32 | 44.86 | 39.07 | 33.34 | 48.15 | 45.43 | 0     |
| 7/11/2017  | 25.59 | 39.22 | 55.30 | 44.75 | 39.12 | 33.33 | 48.16 | 45.44 | 0     |
| 8/11/2017  | 25.49 | 39.15 | 55.19 | 44.68 | 38.75 | 33.52 | 48.19 | 45.48 | 0     |
| 9/11/2017  | 36.87 | 39.40 | 55.31 | 44.98 | 37.08 | 36.84 | 48.12 | 45.45 | 52.2  |
| 10/11/2017 | 48.80 | 39.98 | 55.49 | 45.75 | 33.38 | 38.55 | 48.07 | 45.59 | 2     |
| 11/11/2017 | 48.77 | 39.94 | 55.46 | 45.08 | 33.14 | 38.28 | 48.01 | 45.65 | 3.6   |
| 12/11/2017 | 48.70 | 39.77 | 55.37 | 45.63 | 37.69 | 37.79 | 47.98 | 45.72 | 5     |

|            |       |       |       |       |       |       |       |       |       |
|------------|-------|-------|-------|-------|-------|-------|-------|-------|-------|
| 13/11/2017 | 48.89 | 39.82 | 55.46 | 46.07 | 40.73 | 37.77 | 47.95 | 45.65 | 4.6   |
| 14/11/2017 | 49.11 | 39.84 | 55.55 | 46.02 | 41.78 | 37.63 | 47.94 | 45.78 | 2.8   |
| 15/11/2017 | 48.98 | 39.58 | 55.46 | 45.86 | 39.74 | 38.17 | 47.97 | 45.83 | 0.8   |
| 16/11/2017 | 48.96 | 39.41 | 55.49 | 45.69 | 39.07 | 38.67 | 47.99 | 45.68 | 1.4   |
| 17/11/2017 | 49.00 | 39.31 | 55.46 | 45.52 | 39.07 | 38.62 | 47.97 | 45.77 | 0.8   |
| 18/11/2017 | 49.10 | 39.19 | 55.50 | 45.50 | 38.94 | 38.61 | 47.96 | 45.84 | 0     |
| 19/11/2017 | 49.13 | 39.15 | 55.47 | 45.50 | 38.87 | 38.73 | 48.00 | 45.76 | 0     |
| 20/11/2017 | 49.23 | 39.15 | 55.57 | 45.70 | 40.90 | 38.77 | 48.02 | 45.85 | 0     |
| 21/11/2017 | 49.47 | 39.29 | 55.79 | 46.01 | 43.01 | 39.10 | 48.07 | 45.91 | 146.4 |
| 22/11/2017 | 49.57 | 39.31 | 55.90 | 46.10 | 43.36 | 39.12 | 48.07 | 46.02 | 15.6  |
| 23/11/2017 | 50.35 | 39.29 | 55.77 | 46.35 | 43.05 | 39.36 | 48.17 | 45.99 | 0.2   |
| 24/11/2017 | 51.39 | 39.26 | 55.82 | 46.30 | 42.67 | 39.31 | 48.08 | 45.97 | 10    |
| 25/11/2017 | 51.57 | 39.27 | 55.85 | 46.49 | 42.24 | 39.53 | 48.12 | 46.09 | 3.6   |
| 26/11/2017 | 50.56 | 39.19 | 55.73 | 46.13 | 41.98 | 39.47 | 48.09 | 46.01 | 0     |
| 27/11/2017 | 49.85 | 38.74 | 55.78 | 45.75 | 39.65 | 39.14 | 48.17 | 46.07 | 0     |
| 28/11/2017 | 49.92 | 39.13 | 55.82 | 46.48 | 39.46 | 39.11 | 48.12 | 46.15 | 10.6  |
| 29/11/2017 | 49.98 | 39.24 | 55.90 | 45.97 | 38.10 | 37.58 | 48.06 | 46.09 | 0.4   |
| 30/11/2017 | 50.03 | 39.30 | 55.76 | 46.24 | 38.31 | 34.28 | 48.08 | 46.11 | 24.4  |
| 1/12/2017  | 50.06 | 39.06 | 55.84 | 45.67 | 36.14 | 36.29 | 48.09 | 46.12 | 0.2   |
| 2/12/2017  | 50.12 | 38.90 | 55.77 | 44.95 | 37.87 | 37.69 | 48.08 | 46.10 | 0.6   |
| 3/12/2017  | 50.03 | 38.86 | 55.76 | 44.87 | 37.77 | 37.58 | 47.98 | 46.16 | 3.6   |
| 4/12/2017  | 50.20 | 38.58 | 55.71 | 45.05 | 37.30 | 36.69 | 48.17 | 46.14 | 2.6   |
| 5/12/2017  | 50.12 | 38.18 | 55.72 | 45.48 | 36.88 | 36.74 | 48.02 | 46.12 | 0     |
| 6/12/2017  | 50.18 | 37.99 | 55.68 | 45.44 | 36.63 | 36.74 | 47.95 | 46.10 | 0     |
| 7/12/2017  | 50.18 | 37.70 | 55.73 | 45.44 | 36.59 | 36.57 | 48.06 | 46.22 | 0     |
| 8/12/2017  | 50.12 | 37.82 | 55.82 | 45.31 | 36.63 | 36.25 | 48.03 | 46.10 | 0     |
| 9/12/2017  | 48.85 | 38.04 | 55.79 | 45.22 | 36.87 | 36.08 | 48.07 | 46.19 | 0     |
| 10/12/2017 | 40.61 | 37.70 | 55.85 | 44.96 | 36.70 | 36.06 | 48.04 | 46.20 | 0     |
| 11/12/2017 | 32.12 | 37.30 | 55.76 | 44.44 | 36.53 | 36.25 | 48.06 | 46.20 | 0     |
| 12/12/2017 | 29.73 | 37.09 | 55.76 | 43.99 | 36.53 | 36.39 | 48.11 | 46.13 | 0.2   |
| 13/12/2017 | 28.51 | 37.17 | 55.53 | 44.04 | 38.07 | 37.21 | 47.93 | 46.22 | 2.4   |
| 14/12/2017 | 27.57 | 36.97 | 55.04 | 44.33 | 39.96 | 38.49 | 47.97 | 46.34 | 0     |
| 15/12/2017 | 27.06 | 36.90 | 55.20 | 44.38 | 39.95 | 35.67 | 48.02 | 46.23 | 0     |
| 16/12/2017 | 26.64 | 36.90 | 55.22 | 44.36 | 40.13 | 35.85 | 47.94 | 46.33 | 3.6   |
| 17/12/2017 | 26.24 | 36.97 | 55.23 | 43.68 | 40.18 | 36.05 | 47.95 | 46.20 | 1.2   |
| 18/12/2017 | 25.92 | 37.01 | 55.23 | 43.56 | 39.91 | 36.15 | 47.96 | 46.23 | 0     |
| 19/12/2017 | 25.73 | 36.41 | 55.29 | 43.28 | 39.58 | 36.52 | 47.94 | 46.23 | 0     |
| 20/12/2017 | 25.50 | 35.49 | 55.11 | 43.32 | 39.33 | 36.54 | 47.93 | 46.30 | 0     |
| 21/12/2017 | 25.30 | 35.51 | 55.08 | 43.69 | 39.10 | 36.84 | 47.80 | 46.41 | 3.6   |
| 22/12/2017 | 25.02 | 35.66 | 55.02 | 43.80 | 38.67 | 37.14 | 47.75 | 46.33 | 0     |
| 23/12/2017 | 24.87 | 35.62 | 55.11 | 43.59 | 38.47 | 37.25 | 47.78 | 46.30 | 0     |
| 24/12/2017 | 24.72 | 35.56 | 55.13 | 43.43 | 38.18 | 37.15 | 47.88 | 46.35 | 0     |
| 25/12/2017 | 24.50 | 35.53 | 55.09 | 43.34 | 37.95 | 37.16 | 47.91 | 46.39 | 0     |
| 26/12/2017 | 24.33 | 35.40 | 55.09 | 43.04 | 37.78 | 36.97 | 47.86 | 46.24 | 0     |
| 27/12/2017 | 24.15 | 35.38 | 55.13 | 42.87 | 37.47 | 36.97 | 47.92 | 46.33 | 0     |
| 28/12/2017 | 23.96 | 35.35 | 55.21 | 42.90 | 37.34 | 36.98 | 47.93 | 46.46 | 0     |



|            |       |       |       |       |       |       |       |       |       |
|------------|-------|-------|-------|-------|-------|-------|-------|-------|-------|
| 29/12/2017 | 23.75 | 35.66 | 55.18 | 44.01 | 37.13 | 37.34 | 47.92 | 46.37 | 0     |
| 30/12/2017 | 23.51 | 35.49 | 55.19 | 43.90 | 36.73 | 37.15 | 47.99 | 46.31 | 0     |
| 31/12/2017 | 23.29 | 35.42 | 55.18 | 43.73 | 36.61 | 37.18 | 47.89 | 46.33 | 0     |
| 1/01/2018  | 23.10 | 35.20 | 55.25 | 43.69 | 37.41 | 37.24 | 47.90 | 46.41 | 0     |
| 2/01/2018  | 22.90 | 35.23 | 55.18 | 43.05 | 37.59 | 37.04 | 47.96 | 46.36 | 0     |
| 3/01/2018  | 22.62 | 33.95 | 55.13 | 41.83 | 37.72 | 37.22 | 47.92 | 46.43 | 0.8   |
| 4/01/2018  | 22.25 | 32.99 | 55.23 | 42.21 | 37.77 | 37.67 | 47.89 | 46.32 | 10.2  |
| 5/01/2018  | 22.20 | 34.14 | 55.38 | 42.60 | 37.54 | 37.33 | 47.85 | 46.54 | 10.7  |
| 6/01/2018  | 25.95 | 37.25 | 55.78 | 42.90 | 33.77 | 37.36 | 47.92 | 46.34 | 32.5  |
| 7/01/2018  | 24.59 | 37.44 | 55.83 | 42.92 | 38.33 | 37.14 | 47.98 | 46.56 | 5.7   |
| 8/01/2018  | 24.07 | 37.25 | 55.83 | 43.46 | 38.44 | 37.17 | 48.06 | 46.52 | 3.7   |
| 9/01/2018  | 23.76 | 37.44 | 55.96 | 43.77 | 37.89 | 37.21 | 48.06 | 46.58 | 1.4   |
| 10/01/2018 | 23.54 | 35.97 | 55.77 | 43.51 | 39.08 | 38.25 | 48.07 | 46.56 | 1.4   |
| 11/01/2018 | 23.65 | 36.08 | 55.34 | 43.86 | 40.21 | 39.66 | 48.11 | 46.58 | 12.8  |
| 12/01/2018 | 24.26 | 36.94 | 55.32 | 43.98 | 39.84 | 39.45 | 47.88 | 46.76 | 5.1   |
| 13/01/2018 | 24.45 | 37.05 | 55.35 | 43.71 | 39.51 | 39.36 | 47.61 | 46.86 | 0     |
| 14/01/2018 | 24.14 | 36.98 | 55.46 | 43.82 | 38.86 | 39.13 | 47.69 | 46.89 | 0     |
| 15/01/2018 | 23.92 | 36.45 | 55.64 | 43.85 | 38.70 | 38.83 | 47.71 | 46.98 | 0.7   |
| 16/01/2018 | 49.63 | 38.09 | 56.01 | 45.24 | 44.75 | 39.51 | 47.69 | 47.03 | 48.3  |
| 17/01/2018 | 51.83 | 38.75 | 56.00 | 46.01 | 46.17 | 39.76 | 47.69 | 47.13 | 111.9 |
| 18/01/2018 | 51.90 | 38.82 | 55.87 | 46.04 | 46.27 | 40.85 | 47.78 | 47.19 | 84.3  |
| 19/01/2018 | 52.41 | 38.77 | 55.90 | 45.86 | 46.30 | 41.34 | 48.01 | 47.17 | 2     |
| 20/01/2018 | 52.14 | 38.44 | 56.19 | 45.60 | 46.23 | 41.30 | 48.91 | 47.18 | 1.5   |
| 21/01/2018 | 51.26 | 38.23 | 57.26 | 45.38 | 46.79 | 41.02 | 49.02 | 47.30 | 0.1   |
| 22/01/2018 | 50.91 | 38.04 | 57.29 | 45.50 | 46.57 | 41.11 | 48.81 | 47.22 | 0.4   |
| 23/01/2018 | 51.62 | 38.55 | 57.31 | 45.55 | 46.42 | 41.34 | 48.73 | 47.12 | 24.2  |
| 24/01/2018 | 52.10 | 38.97 | 56.92 | 45.70 | 46.44 | 41.15 | 48.33 | 47.06 | 61.3  |
| 25/01/2018 | 52.17 | 39.27 | 56.53 | 45.34 | 46.08 | 41.85 | 48.33 | 46.94 | 28.7  |
| 26/01/2018 | 52.34 | 38.90 | 56.80 | 45.34 | 46.02 | 41.60 | 48.17 | 46.98 | 38.4  |
| 27/01/2018 | 52.61 | 38.45 | 57.84 | 45.64 | 46.61 | 41.51 | 48.50 | 47.24 | 6.5   |
| 28/01/2018 | 52.31 | 37.99 | 57.76 | 45.32 | 46.36 | 41.51 | 49.02 | 47.27 | 2.1   |
| 29/01/2018 | 52.10 | 37.91 | 56.86 | 44.76 | 45.49 | 41.39 | 48.99 | 47.22 | 0.1   |
| 30/01/2018 | 51.34 | 37.88 | 57.32 | 45.59 | 45.90 | 41.23 | 48.85 | 47.28 | 0.8   |
| 31/01/2018 | 51.33 | 38.15 | 56.51 | 44.87 | 44.91 | 41.41 | 48.71 | 47.26 | 0     |
| 1/02/2018  | 50.23 | 37.67 | 56.61 | 44.51 | 44.60 | 41.00 | 48.46 | 47.31 | 0     |
| 2/02/2018  | 37.77 | 37.47 | 56.37 | 44.32 | 43.34 | 41.02 | 48.73 | 47.41 | 0     |
| 3/02/2018  | 29.09 | 37.28 | 55.85 | 44.19 | 42.61 | 40.80 | 48.58 | 47.32 | 0     |
| 4/02/2018  | 44.87 | 37.69 | 55.72 | 44.82 | 43.26 | 40.93 | 48.20 | 47.34 | 79    |
| 5/02/2018  | 53.42 | 38.44 | 57.01 | 45.50 | 45.00 | 41.63 | 49.51 | 47.47 | 313.3 |
| 6/02/2018  | 53.24 | 39.40 | 57.27 | 45.78 | 45.17 | 41.82 | 48.44 | 47.34 | 20.3  |
| 7/02/2018  | 53.31 | 39.48 | 57.14 | 45.37 | 44.43 | 41.64 | 48.44 | 47.33 | 6     |
| 8/02/2018  | 53.18 | 39.57 | 57.04 | 44.83 | 43.81 | 42.01 | 48.51 | 47.16 | 8.6   |
| 9/02/2018  | 53.41 | 39.26 | 57.19 | 44.97 | 43.75 | 42.30 | 48.42 | 47.19 | 3.9   |
| 10/02/2018 | 53.38 | 38.49 | 57.99 | 45.25 | 44.11 | 41.87 | 49.26 | 47.55 | 9.9   |
| 11/02/2018 | 52.97 | 37.99 | 57.18 | 44.65 | 42.89 | 41.58 | 49.00 | 47.45 | 0     |
| 12/02/2018 | 53.13 | 37.92 | 56.76 | 44.89 | 42.60 | 41.86 | 48.76 | 47.54 | 0     |

|            |       |       |       |       |       |       |       |       |       |
|------------|-------|-------|-------|-------|-------|-------|-------|-------|-------|
| 13/02/2018 | 52.46 | 37.75 | 56.77 | 44.64 | 41.82 | 41.44 | 48.71 | 47.51 | 0     |
| 14/02/2018 | 49.60 | 37.61 | 56.23 | 44.54 | 41.39 | 40.65 | 48.93 | 47.53 | 0     |
| 15/02/2018 | 36.90 | 37.45 | 56.07 | 44.35 | 41.35 | 41.32 | 48.31 | 47.49 | 0     |
| 16/02/2018 | 29.49 | 37.25 | 56.08 | 44.75 | 40.43 | 41.60 | 48.12 | 47.45 | 0     |
| 17/02/2018 | 27.92 | 37.12 | 56.34 | 44.50 | 40.29 | 41.43 | 48.40 | 47.54 | 6.4   |
| 18/02/2018 | 27.05 | 37.00 | 56.67 | 44.23 | 40.12 | 41.38 | 48.40 | 47.61 | 0.1   |
| 19/02/2018 | 26.40 | 36.92 | 55.79 | 44.26 | 40.01 | 41.45 | 48.12 | 47.56 | 0     |
| 20/02/2018 | 26.19 | 36.76 | 55.65 | 44.20 | 39.77 | 41.20 | 48.05 | 47.56 | 0     |
| 21/02/2018 | 30.17 | 36.94 | 55.71 | 44.28 | 39.66 | 40.88 | 48.03 | 47.55 | 49    |
| 22/02/2018 | 53.68 | 38.58 | 56.25 | 45.43 | 40.70 | 41.92 | 48.11 | 47.60 | 18.5  |
| 23/02/2018 | 54.04 | 38.48 | 56.28 | 45.29 | 40.46 | 41.59 | 48.21 | 47.68 | 4.7   |
| 24/02/2018 | 53.94 | 38.43 | 56.22 | 45.04 | 40.51 | 41.63 | 48.24 | 47.73 | 10.2  |
| 25/02/2018 | 54.40 | 38.51 | 56.16 | 45.14 | 41.08 | 42.00 | 48.42 | 47.77 | 47.5  |
| 26/02/2018 | 54.53 | 38.44 | 56.15 | 44.74 | 41.16 | 42.11 | 48.60 | 47.77 | 5.6   |
| 27/02/2018 | 54.56 | 38.32 | 56.18 | 44.46 | 41.05 | 42.27 | 48.62 | 47.85 | 13    |
| 28/02/2018 | 54.46 | 38.23 | 56.80 | 44.53 | 41.14 | 42.34 | 49.80 | 47.82 | 4.2   |
| 1/03/2018  | 54.04 | 38.29 | 58.25 | 45.46 | 43.14 | 41.68 | 48.99 | 47.87 | 17.8  |
| 2/03/2018  |       |       |       |       |       |       |       |       | 1.6   |
| 3/03/2018  |       |       |       |       |       |       |       |       | 0.1   |
| 4/03/2018  |       |       |       |       |       |       |       |       | 9.6   |
| 5/03/2018  |       |       |       |       |       |       |       |       | 0.5   |
| 6/03/2018  |       |       |       |       |       |       |       |       | 49.3  |
| 7/03/2018  |       |       |       |       |       |       |       |       | 127.4 |
| 8/03/2018  |       |       |       |       |       |       |       |       | 138   |
| 9/03/2018  |       |       |       |       |       |       |       |       | 35.6  |
| 10/03/2018 |       |       |       |       |       |       |       |       | 9.2   |
| 11/03/2018 |       |       |       |       |       |       |       |       | 24.3  |
| 12/03/2018 |       |       |       |       |       |       |       |       | 0.5   |
| 13/03/2018 |       |       |       |       |       |       |       |       | 2.6   |
| 14/03/2018 |       |       |       |       |       |       |       |       | 0.1   |
| 15/03/2018 |       |       |       |       |       |       |       |       | 0     |
| 16/03/2018 |       |       |       |       |       |       |       |       | 0     |
| 17/03/2018 |       |       |       |       |       |       |       |       | 0.8   |
| 18/03/2018 |       |       |       |       |       |       |       |       | 16    |
| 19/03/2018 |       |       |       |       |       |       |       |       | 20.2  |
| 20/03/2018 |       |       |       |       |       |       |       |       | 0.3   |
| 21/03/2018 |       |       |       |       |       |       |       |       | 12.4  |
| 22/03/2018 |       |       |       |       |       |       |       |       | 33    |
| 23/03/2018 |       |       |       |       |       |       |       |       | 6     |
| 24/03/2018 |       |       |       |       |       |       |       |       | 52.9  |
| 25/03/2018 |       |       |       |       |       |       |       |       | 15.6  |
| 26/03/2018 |       |       |       |       |       |       |       |       | 43.6  |
| 27/03/2018 |       |       |       |       |       |       |       |       | 236.9 |
| 28/03/2018 |       |       |       |       |       |       |       |       | 86.5  |
| 29/03/2018 |       |       |       |       |       |       |       |       | 0.4   |
| 30/03/2018 |       |       |       |       |       |       |       |       | 0     |

|            |       |       |       |       |       |       |       |       |      |
|------------|-------|-------|-------|-------|-------|-------|-------|-------|------|
| 31/03/2018 |       |       |       |       |       |       |       |       | 0.2  |
| 1/04/2018  |       |       |       |       |       |       |       |       | 0.5  |
| 2/04/2018  |       |       |       |       |       |       |       |       | 10.9 |
| 3/04/2018  |       |       |       |       |       |       |       |       | 0.2  |
| 4/04/2018  |       |       |       |       |       |       |       |       | 6.5  |
| 5/04/2018  |       |       |       |       |       |       |       |       | 11.3 |
| 6/04/2018  |       |       |       |       |       |       |       |       | 2.5  |
| 7/04/2018  |       |       |       |       |       |       |       |       | 4.2  |
| 8/04/2018  |       |       |       |       |       |       |       |       | 1.6  |
| 9/04/2018  |       |       |       |       |       |       |       |       | 8.9  |
| 10/04/2018 |       |       |       |       |       |       |       |       | 1.3  |
| 11/04/2018 |       |       |       |       |       |       |       |       | 6.5  |
| 12/04/2018 |       |       |       |       |       |       |       |       | 1    |
| 13/04/2018 |       |       |       |       |       |       |       |       | 16.5 |
| 14/04/2018 |       |       |       |       |       |       |       |       | 0.4  |
| 15/04/2018 |       |       |       |       |       |       |       |       | 8.2  |
| 16/04/2018 |       |       |       |       |       |       |       |       | 55.8 |
| 17/04/2018 |       |       |       |       |       |       |       |       | 0.5  |
| 18/04/2018 |       |       |       |       |       |       |       |       | 7.7  |
| 19/04/2018 |       |       |       |       |       |       |       |       | 0    |
| 20/04/2018 |       |       |       |       |       |       |       |       | 3.7  |
| 21/04/2018 |       |       |       |       |       |       |       |       | 0.3  |
| 22/04/2018 |       |       |       |       |       |       |       |       | 0    |
| 23/04/2018 |       |       |       |       |       |       |       |       | 17   |
| 24/04/2018 |       |       |       |       |       |       |       |       | 0.3  |
| 25/04/2018 |       |       |       |       |       |       |       |       | 0    |
| 26/04/2018 |       |       |       |       |       |       |       |       | 0    |
| 27/04/2018 |       |       |       |       |       |       |       |       | 0    |
| 28/04/2018 |       |       |       |       |       |       |       |       | 7    |
| 29/04/2018 |       |       |       |       |       |       |       |       | 7.3  |
| 30/04/2018 |       |       |       |       |       |       |       |       | 8.4  |
| 1/05/2018  |       |       |       |       |       |       |       |       | 33.4 |
| 2/05/2018  |       |       |       |       |       |       |       |       | 12.4 |
| 3/05/2018  |       |       |       |       |       |       |       |       | 2.3  |
| 4/05/2018  |       |       |       |       |       |       |       |       | 0.1  |
| 5/05/2018  |       |       |       |       |       |       |       |       | 0.1  |
| 6/05/2018  |       |       |       |       |       |       |       |       | 2.2  |
| 7/05/2018  |       |       |       |       |       |       |       |       | 3.2  |
| 8/05/2018  |       |       |       |       |       |       |       |       | 25.4 |
| 9/05/2018  |       |       |       |       |       |       |       |       | 0.9  |
| 10/05/2018 |       |       |       |       |       |       |       |       | 0    |
| 11/05/2018 | 54.71 | 38.57 | 58.19 | 46.52 | 39.83 | 41.70 | 50.00 | 47.18 | 0    |
| 12/05/2018 | 54.96 | 38.44 | 58.02 | 46.65 | 39.77 | 41.69 | 49.82 | 47.18 | 0.1  |
| 13/05/2018 | 55.74 | 38.39 | 58.00 | 46.59 | 39.64 | 41.60 | 49.81 | 47.13 | 0    |
| 14/05/2018 | 54.99 | 38.28 | 57.96 | 46.60 | 39.55 | 41.50 | 49.86 | 47.15 | 0    |
| 15/05/2018 | 45.00 | 38.12 | 57.93 | 46.38 | 39.46 | 41.39 | 49.86 | 47.16 | 0.1  |

|            |       |       |       |       |       |       |       |       |      |
|------------|-------|-------|-------|-------|-------|-------|-------|-------|------|
| 16/05/2018 | 34.52 | 37.94 | 57.88 | 46.19 | 39.27 | 41.21 | 49.92 | 47.10 | 2.5  |
| 17/05/2018 | 51.59 | 38.27 | 57.99 | 46.17 | 39.77 | 41.28 | 49.86 | 47.31 | 29.1 |
| 18/05/2018 | 55.04 | 38.77 | 58.14 | 46.56 | 43.19 | 41.39 | 49.94 | 47.31 | 1.5  |
| 19/05/2018 | 54.74 | 38.77 | 58.21 | 46.67 | 43.98 | 41.45 | 49.95 | 47.37 | 12.2 |
| 20/05/2018 | 54.96 | 38.91 | 58.25 | 46.98 | 45.15 | 41.51 | 50.01 | 47.39 | 21.5 |
| 21/05/2018 | 54.99 | 38.96 | 58.26 | 47.05 | 45.38 | 41.54 | 50.02 | 47.39 | 0.4  |
| 22/05/2018 | 54.97 | 38.91 | 58.23 | 47.15 | 45.41 | 41.55 | 49.95 | 47.39 | 4.5  |
| 23/05/2018 | 54.84 | 38.71 | 58.24 | 47.00 | 45.31 | 41.51 | 50.02 | 47.37 | 0    |
| 24/05/2018 | 54.80 | 38.41 | 58.24 | 46.83 | 44.97 | 41.43 | 50.01 | 47.29 | 0.9  |
| 25/05/2018 | 54.93 | 38.30 | 58.25 | 46.71 | 44.73 | 41.44 | 50.04 | 47.35 | 5    |
| 26/05/2018 | 55.78 | 38.31 | 58.25 | 46.81 | 44.58 | 41.45 | 50.07 | 47.35 | 5.8  |
| 27/05/2018 | 55.83 | 38.28 | 58.31 | 46.81 | 44.55 | 41.46 | 50.11 | 47.37 | 14.4 |
| 28/05/2018 | 55.85 | 38.54 | 58.30 | 47.16 | 45.02 | 41.54 | 50.17 | 47.43 | 2.6  |
| 29/05/2018 | 55.23 | 38.52 | 58.27 | 47.26 | 45.32 | 41.55 | 50.21 | 47.43 | 14.6 |
| 30/05/2018 | 55.37 | 38.61 | 58.25 | 47.47 | 45.52 | 41.65 | 50.20 | 47.54 | 1.6  |
| 31/05/2018 | 55.18 | 38.48 | 58.26 | 47.30 | 45.49 | 41.60 | 50.23 | 47.53 | 0.1  |
| 1/06/2018  | 55.07 | 38.20 | 58.24 | 47.25 | 45.23 | 41.56 | 50.21 | 47.50 | 0    |
| 2/06/2018  | 55.01 | 38.11 | 58.22 | 47.17 | 44.92 | 41.53 | 50.21 | 47.47 | 0    |
| 3/06/2018  | 54.86 | 37.92 | 58.19 | 47.07 | 44.70 | 41.42 | 50.25 | 47.44 | 0    |
| 4/06/2018  | 54.68 | 37.78 | 58.20 | 46.98 | 44.34 | 41.38 | 50.25 | 47.52 | 0    |
| 5/06/2018  | 48.38 | 37.53 | 58.24 | 47.03 | 44.08 | 41.26 | 50.31 | 47.44 | 0    |
| 6/06/2018  | 37.62 | 37.36 | 58.21 | 46.99 | 43.97 | 40.80 | 50.32 | 47.48 | 0.1  |
| 7/06/2018  | 32.63 | 37.97 | 58.17 | 46.91 | 43.83 | 40.70 | 50.37 | 47.50 | 0    |
| 8/06/2018  | 30.65 | 37.85 | 58.16 | 46.84 | 43.47 | 40.63 | 50.33 | 47.42 | 0.5  |
| 9/06/2018  | 30.17 | 37.86 | 58.19 | 46.74 | 43.00 | 40.52 | 50.38 | 47.44 | 8.1  |
| 10/06/2018 | 40.18 | 38.03 | 58.19 | 46.74 | 42.57 | 40.43 | 50.42 | 47.48 | 0.2  |
| 11/06/2018 | 33.19 | 37.94 | 58.21 | 46.72 | 42.03 | 40.46 | 50.35 | 47.53 | 0    |
| 12/06/2018 | 30.53 | 37.88 | 58.28 | 46.77 | 42.24 | 40.41 | 50.43 | 47.47 | 0    |
| 13/06/2018 | 29.80 | 37.79 | 58.26 | 46.73 | 41.80 | 40.34 | 50.45 | 47.47 | 0    |
| 14/06/2018 | 29.14 | 37.76 | 58.22 | 46.77 | 41.61 | 40.31 | 50.49 | 47.47 | 0.1  |
| 15/06/2018 | 28.31 | 37.84 | 58.21 | 46.63 | 41.74 | 40.26 | 50.52 | 47.52 | 0    |
| 16/06/2018 | 27.87 | 37.77 | 58.10 | 46.48 | 41.89 | 40.15 | 50.52 | 47.55 | 0    |
| 17/06/2018 | 27.55 | 37.78 | 58.01 | 46.18 | 41.58 | 40.24 | 50.54 | 47.51 | 0    |
| 18/06/2018 | 27.37 | 37.79 | 58.05 | 45.92 | 41.52 | 40.39 | 50.62 | 47.50 | 0    |
| 19/06/2018 | 27.16 | 37.82 | 58.04 | 46.00 | 41.24 | 40.26 | 50.60 | 47.53 | 0    |
| 20/06/2018 | 26.96 | 37.69 | 58.05 | 45.95 | 41.25 | 40.21 | 50.63 | 47.51 | 0    |
| 21/06/2018 | 26.73 | 36.97 | 58.05 | 45.96 | 40.92 | 40.16 | 50.60 | 47.47 | 0    |
| 22/06/2018 | 27.71 | 36.48 | 58.09 | 45.96 | 41.00 | 40.10 | 50.67 | 47.58 | 23.9 |
| 23/06/2018 | 54.64 | 38.99 | 58.29 | 47.03 | 43.42 | 40.44 | 50.72 | 47.60 | 12.7 |
| 24/06/2018 | 55.69 | 39.39 | 58.39 | 47.40 | 44.33 | 40.54 | 50.71 | 47.74 | 18.1 |
| 25/06/2018 | 55.93 | 39.67 | 58.50 | 47.75 | 45.00 | 40.68 | 50.73 | 47.79 | 0    |
| 26/06/2018 | 55.30 | 39.91 | 58.51 | 47.97 | 45.21 | 40.75 | 50.67 | 47.74 | 13.7 |
| 27/06/2018 | 56.06 | 40.18 | 58.60 | 48.41 | 45.93 | 40.85 | 50.69 | 47.72 | 6.4  |
| 28/06/2018 | 56.19 | 40.22 | 58.61 | 48.58 | 46.29 | 40.91 | 50.68 | 47.83 | 5.2  |
| 29/06/2018 | 56.38 | 40.25 | 58.63 | 48.73 | 46.58 | 40.93 | 50.72 | 47.81 | 5.9  |
| 30/06/2018 | 56.50 | 40.21 | 58.67 | 48.96 | 46.80 | 41.00 | 50.72 | 47.81 | 6.7  |

|            |       |       |       |       |       |       |       |       |      |
|------------|-------|-------|-------|-------|-------|-------|-------|-------|------|
| 1/07/2018  | 56.57 | 40.22 | 58.71 | 49.07 | 47.08 | 41.04 | 50.75 | 47.88 | 26.6 |
| 2/07/2018  | 56.61 | 40.27 | 58.68 | 49.20 | 47.51 | 41.12 | 50.78 | 47.82 | 22.5 |
| 3/07/2018  | 56.40 | 40.18 | 58.69 | 49.21 | 47.49 | 41.18 | 50.84 | 47.87 | 0.1  |
| 4/07/2018  | 55.60 | 40.03 | 58.66 | 49.13 | 47.33 | 41.16 | 50.84 | 47.87 | 1.1  |
| 5/07/2018  | 55.12 | 39.69 | 58.58 | 48.95 | 47.05 | 41.06 | 50.83 | 47.87 | 0    |
| 6/07/2018  | 55.02 | 39.44 | 58.56 | 48.81 | 46.93 | 41.02 | 50.84 | 47.91 | 0    |
| 7/07/2018  | 54.90 | 39.13 | 58.59 | 48.82 | 46.81 | 40.97 | 50.83 | 47.85 | 1.7  |
| 8/07/2018  | 54.97 | 39.07 | 58.60 | 48.90 | 46.83 | 41.00 | 50.84 | 47.88 | 2.8  |
| 9/07/2018  | 54.90 | 39.02 | 58.56 | 48.83 | 46.80 | 40.97 | 50.90 | 47.91 | 0    |
| 10/07/2018 | 54.81 | 38.89 | 58.59 | 48.79 | 46.78 | 40.95 | 50.82 | 47.84 | 0    |
| 11/07/2018 | 54.40 | 38.72 | 58.58 | 48.67 | 46.62 | 40.83 | 50.90 | 47.90 | 1.2  |
| 12/07/2018 | 48.21 | 38.53 | 58.59 | 48.60 | 46.58 | 40.74 | 50.89 | 47.85 | 0    |
| 13/07/2018 | 38.45 | 38.45 | 58.46 | 48.41 | 46.42 | 40.63 | 50.94 | 47.87 | 0.1  |
| 14/07/2018 | 32.13 | 38.26 | 58.47 | 47.80 | 46.34 | 40.60 | 50.93 | 47.83 | 0    |
| 15/07/2018 | 30.65 | 38.33 | 58.46 | 47.92 | 46.29 | 40.53 | 50.92 | 47.91 | 0    |
| 16/07/2018 | 29.77 | 38.32 | 58.47 | 47.40 | 46.17 | 40.52 | 50.95 | 47.88 | 0    |
| 17/07/2018 | 29.17 | 38.17 | 58.41 | 47.19 | 45.75 | 40.46 | 50.96 | 47.89 | 0    |
| 18/07/2018 | 28.61 | 38.11 | 57.95 | 47.60 | 43.97 | 40.80 | 50.94 | 47.86 | 5.3  |
| 19/07/2018 | 28.56 | 38.09 | 57.49 | 47.93 | 42.23 | 41.23 | 50.98 | 47.94 | 0.5  |
| 20/07/2018 | 28.30 | 38.15 | 57.68 | 47.46 | 40.98 | 41.26 | 50.96 | 47.98 | 0.1  |
| 21/07/2018 | 28.00 | 38.12 | 57.92 | 47.21 | 40.99 | 41.29 | 50.99 | 47.97 | 0    |
| 22/07/2018 | 27.67 | 38.06 | 57.98 | 47.12 | 41.18 | 41.27 | 51.08 | 47.94 | 0.2  |
| 23/07/2018 | 27.46 | 37.98 | 57.87 | 47.13 | 41.24 | 41.23 | 51.04 | 47.94 | 0    |
| 24/07/2018 | 27.34 | 37.87 | 57.82 | 47.37 | 41.07 | 41.19 | 51.03 | 47.88 | 3.7  |
| 25/07/2018 | 27.26 | 37.88 | 57.82 | 47.45 | 40.93 | 41.18 | 51.07 | 47.95 | 0.4  |
| 26/07/2018 | 27.15 | 37.99 | 57.86 | 47.48 | 40.76 | 41.16 | 51.08 | 47.98 | 0    |
| 27/07/2018 | 27.00 | 38.03 | 57.77 | 47.52 | 40.58 | 41.08 | 51.10 | 47.93 | 0    |
| 28/07/2018 | 26.85 | 37.98 | 57.76 | 47.28 | 40.42 | 41.07 | 51.07 | 47.96 | 0    |
| 29/07/2018 | 26.77 | 37.94 | 57.76 | 47.17 | 40.37 | 41.03 | 51.08 | 47.91 | 0    |
| 30/07/2018 | 26.61 | 37.73 | 57.75 | 47.47 | 40.25 | 41.01 | 51.14 | 47.99 | 0    |
| 31/07/2018 | 26.51 | 37.36 | 57.80 | 47.11 | 40.14 | 40.98 | 51.14 | 47.98 | 0    |
| 1/08/2018  | 26.40 | 36.82 | 57.74 | 47.02 | 39.98 | 40.97 | 51.12 | 48.00 | 0    |
| 2/08/2018  | 26.30 | 36.77 | 57.80 | 47.28 | 39.84 | 40.93 | 51.12 | 48.03 | 0    |
| 3/08/2018  | 26.22 | 36.70 | 57.76 | 47.37 | 39.79 | 40.87 | 51.17 | 48.03 | 0    |
| 4/08/2018  | 26.10 | 36.78 | 57.77 | 47.31 | 39.68 | 40.81 | 51.20 | 48.09 | 0    |
| 5/08/2018  | 26.01 | 37.83 | 57.76 | 47.39 | 39.57 | 40.71 | 51.17 | 48.02 | 0    |
| 6/08/2018  | 25.91 | 37.12 | 57.72 | 47.34 | 39.45 | 40.59 | 51.16 | 48.03 | 0    |
| 7/08/2018  | 25.82 | 36.70 | 57.80 | 47.40 | 39.81 | 40.43 | 51.22 | 48.07 | 0    |
| 8/08/2018  | 25.77 | 36.59 | 57.77 | 47.45 | 39.92 | 40.41 | 51.22 | 48.07 | 0    |
| 9/08/2018  | 25.68 | 36.56 | 57.79 | 47.82 | 39.86 | 40.36 | 51.21 | 48.06 | 0    |
| 10/08/2018 | 25.57 | 36.52 | 57.80 | 47.81 | 39.85 | 40.34 | 51.20 | 48.06 | 0    |
| 11/08/2018 | 25.47 | 36.54 | 57.73 | 47.65 | 39.80 | 40.22 | 51.26 | 48.14 | 0    |
| 12/08/2018 | 25.41 | 36.68 | 57.74 | 47.46 | 39.70 | 40.21 | 51.24 | 48.07 | 0    |
| 13/08/2018 | 25.32 | 36.62 | 57.72 | 47.39 | 39.86 | 40.15 | 51.25 | 48.17 | 0    |
| 14/08/2018 | 25.24 | 36.71 | 57.78 | 47.37 | 40.12 | 40.10 | 51.24 | 48.07 | 0    |
| 15/08/2018 | 25.17 | 36.79 | 57.73 | 47.30 | 40.05 | 40.05 | 51.31 | 48.14 | 1.6  |

|            |       |       |       |       |       |       |       |       |     |
|------------|-------|-------|-------|-------|-------|-------|-------|-------|-----|
| 16/08/2018 | 25.08 | 36.87 | 57.75 | 47.58 | 39.95 | 39.97 | 51.26 | 48.09 | 0   |
| 17/08/2018 | 25.03 | 36.85 | 57.77 | 47.50 | 39.68 | 39.79 | 51.23 | 48.11 | 0   |
| 18/08/2018 | 24.91 | 36.10 | 57.80 | 47.47 | 39.63 | 39.70 | 51.25 | 48.16 | 0   |
| 19/08/2018 | 24.86 | 35.01 | 57.77 | 47.34 | 39.59 | 39.63 | 51.13 | 48.06 | 0   |
| 20/08/2018 | 24.81 | 35.02 | 57.76 | 47.60 | 39.47 | 39.59 | 51.19 | 48.08 | 0   |
| 21/08/2018 | 24.85 | 34.75 | 57.76 | 47.60 | 39.47 | 38.54 | 51.20 | 48.12 | 0   |
| 22/08/2018 | 24.83 | 33.80 | 57.77 | 47.70 | 39.50 | 38.07 | 51.13 | 48.14 | 0   |
| 23/08/2018 | 24.79 | 33.12 | 57.76 | 47.63 | 39.70 | 38.01 | 51.19 | 48.07 | 0   |
| 24/08/2018 | 24.71 | 32.83 | 57.72 | 47.58 | 39.55 | 37.96 | 51.16 | 48.16 | 0   |
| 25/08/2018 | 24.64 | 33.87 | 57.78 | 47.71 | 39.42 | 37.95 | 51.20 | 48.10 | 0   |
| 26/08/2018 | 24.58 | 34.15 | 57.79 | 47.82 | 39.55 | 37.89 | 51.17 | 48.15 | 0   |
| 27/08/2018 | 24.44 | 33.02 | 57.76 | 47.78 | 39.59 | 37.72 | 51.18 | 48.09 | 0   |
| 28/08/2018 | 24.35 | 32.42 | 57.74 | 47.71 | 39.45 | 37.71 | 51.22 | 48.11 | 0   |
| 29/08/2018 | 24.26 | 32.58 | 57.80 | 47.76 | 39.52 | 37.64 | 51.18 | 48.08 | 0   |
| 30/08/2018 | 24.16 | 32.28 | 57.71 | 47.63 | 39.40 | 37.61 | 51.23 | 48.05 | 0   |
| 31/08/2018 | 24.03 | 32.01 | 57.71 | 47.61 | 39.34 | 37.55 | 51.25 | 48.00 | 0   |
| 1/09/2018  | 23.92 | 31.85 | 57.70 | 47.54 | 39.34 | 37.42 | 51.26 | 48.00 | 0   |
| 2/09/2018  | 23.80 | 31.77 | 57.71 | 47.45 | 39.75 | 37.35 | 51.27 | 48.07 | 0   |
| 3/09/2018  | 23.64 | 31.62 | 57.72 | 47.41 | 39.72 | 37.31 | 51.25 | 48.10 | 0   |
| 4/09/2018  | 23.50 | 31.51 | 57.70 | 47.38 | 39.94 | 37.25 | 51.29 | 48.10 | 0   |
| 5/09/2018  | 23.32 | 31.37 | 57.64 | 47.26 | 39.79 | 37.20 | 51.30 | 48.08 | 0   |
| 6/09/2018  | 23.16 | 31.20 | 57.67 | 47.27 | 39.70 | 37.16 | 51.29 | 48.06 | 0   |
| 7/09/2018  | 23.05 | 31.10 | 57.67 | 47.22 | 39.67 | 37.12 | 51.32 | 48.10 | 0.2 |
| 8/09/2018  | 22.84 | 30.99 | 57.66 | 47.10 | 39.86 | 36.99 | 51.33 | 48.09 | 0.1 |
| 9/09/2018  | 22.68 | 31.08 | 57.58 | 47.14 | 39.82 | 36.89 | 51.35 | 48.13 | 0   |
| 10/09/2018 | 22.53 | 30.97 | 57.59 | 47.19 | 39.68 | 39.48 | 51.31 | 48.17 | 0   |
| 11/09/2018 | 22.37 | 30.92 | 57.53 | 47.12 | 39.49 | 39.65 | 51.35 | 48.19 | 0   |
| 12/09/2018 | 22.17 | 30.81 | 57.67 | 47.18 | 39.49 | 39.61 | 51.37 | 48.10 | 0   |
| 13/09/2018 | 22.01 | 30.70 | 57.59 | 47.21 | 39.49 | 39.55 | 51.34 | 48.10 | 7.2 |
| 14/09/2018 | 21.87 | 30.70 | 57.58 | 47.20 | 39.36 | 39.54 | 51.36 | 48.20 | 0.2 |
| 15/09/2018 | 21.82 | 30.68 | 57.57 | 47.00 | 38.84 | 39.77 | 51.38 | 48.14 | 0   |
| 16/09/2018 | 21.74 | 30.70 | 57.47 | 47.26 | 38.88 | 40.26 | 51.43 | 48.21 | 0   |
| 17/09/2018 | 21.61 | 30.61 | 57.47 | 47.30 | 39.76 | 40.27 | 51.45 | 48.20 | 0   |
| 18/09/2018 | 21.42 | 30.52 | 57.38 | 47.20 | 39.50 | 40.20 | 51.40 | 48.19 | 0.1 |
| 19/09/2018 | 21.24 | 30.98 | 57.55 | 47.26 | 39.72 | 40.41 | 51.41 | 48.24 | 3.2 |
| 20/09/2018 | 21.12 | 30.38 | 57.84 | 47.75 | 40.61 | 41.02 | 51.41 | 48.12 | 0   |
| 21/09/2018 | 20.94 | 30.67 | 58.31 | 47.48 | 41.02 | 40.89 | 51.40 | 48.15 | 0   |
| 22/09/2018 | 20.62 | 30.03 | 58.56 | 47.37 | 41.31 | 40.96 | 51.42 | 48.16 | 0   |
| 23/09/2018 | 20.28 | 29.96 | 58.38 | 47.37 | 41.18 | 40.92 | 51.46 | 48.20 | 1.7 |
| 24/09/2018 | 20.05 | 29.90 | 58.42 | 47.36 | 40.86 | 40.84 | 51.45 | 48.24 | 0   |
| 25/09/2018 | 19.82 | 29.83 | 58.39 | 47.31 | 40.74 | 40.80 | 51.43 | 48.28 | 0.2 |
| 26/09/2018 | 19.60 | 29.73 | 58.26 | 47.33 | 40.52 | 40.74 | 51.47 | 48.23 | 4   |
| 27/09/2018 | 19.46 | 29.60 | 57.94 | 47.21 | 40.39 | 40.65 | 51.45 | 48.31 | 0.3 |
| 28/09/2018 | 19.31 | 29.52 | 57.63 | 47.23 | 40.42 | 40.56 | 51.47 | 48.22 | 0   |
| 29/09/2018 | 19.07 | 29.40 | 57.85 | 47.27 | 40.37 | 40.51 | 51.50 | 48.27 | 0   |
| 30/09/2018 | 18.73 | 29.30 | 57.43 | 47.25 | 40.26 | 40.44 | 51.47 | 48.29 | 0   |

|            |       |       |       |       |       |       |       |       |      |
|------------|-------|-------|-------|-------|-------|-------|-------|-------|------|
| 1/10/2018  | 18.44 | 29.10 | 56.86 | 47.23 | 40.24 | 40.36 | 51.48 | 48.31 | 0.4  |
| 2/10/2018  | 18.12 | 28.93 | 55.78 | 47.16 | 40.21 | 40.31 | 51.49 | 48.36 | 0.4  |
| 3/10/2018  | 17.82 | 28.60 | 55.21 | 47.17 | 40.09 | 40.16 | 51.57 | 48.38 | 1.2  |
| 4/10/2018  | 17.41 | 27.89 | 55.14 | 47.13 | 39.94 | 40.11 | 51.58 | 48.33 | 0    |
| 5/10/2018  | 16.95 | 27.52 | 54.79 | 47.04 | 39.82 | 39.96 | 51.54 | 48.38 | 0    |
| 6/10/2018  | 16.66 | 27.07 | 54.62 | 47.09 | 39.67 | 39.91 | 51.56 | 48.39 | 0    |
| 7/10/2018  | 16.37 | 26.81 | 55.13 | 47.08 | 39.65 | 39.84 | 51.54 | 48.32 | 0    |
| 8/10/2018  | 16.07 | 26.59 | 55.76 | 46.98 | 39.55 | 39.76 | 51.59 | 48.32 | 0    |
| 9/10/2018  | 15.63 | 26.66 | 55.69 | 47.17 | 39.16 | 40.49 | 51.57 | 48.41 | 0    |
| 10/10/2018 | 15.43 | 26.39 | 54.91 | 47.27 | 38.89 | 41.09 | 51.53 | 48.37 | 0    |
| 11/10/2018 | 15.37 | 26.17 | 54.72 | 47.22 | 38.73 | 41.02 | 51.54 | 48.31 | 0    |
| 12/10/2018 | 15.28 | 26.05 | 55.03 | 47.20 | 38.82 | 40.92 | 51.57 | 48.37 | 0    |
| 13/10/2018 | 15.22 | 25.92 | 54.33 | 47.07 | 38.79 | 40.82 | 51.60 | 48.32 | 7.1  |
| 14/10/2018 | 15.15 | 25.86 | 54.27 | 47.05 | 38.70 | 40.73 | 51.60 | 48.44 | 0.2  |
| 15/10/2018 | 15.10 | 25.91 | 54.23 | 47.02 | 38.62 | 40.71 | 51.56 | 48.41 | 0    |
| 16/10/2018 | 15.07 | 25.96 | 54.04 | 46.98 | 38.54 | 40.70 | 51.55 | 48.35 | 0    |
| 17/10/2018 | 15.11 | 25.99 | 53.98 | 46.68 | 38.65 | 40.68 | 51.57 | 48.42 | 0    |
| 18/10/2018 | 15.11 | 25.98 | 53.96 | 46.78 | 38.58 | 40.62 | 51.60 | 48.30 | 0    |
| 19/10/2018 | 15.09 | 25.95 | 53.61 | 46.73 | 38.49 | 40.53 | 51.58 | 48.37 | 0    |
| 20/10/2018 | 15.09 | 25.96 | 53.39 | 46.79 | 38.42 | 40.36 | 51.64 | 48.43 | 0    |
| 21/10/2018 | 15.06 | 25.94 | 53.19 | 46.82 | 38.32 | 40.29 | 51.63 | 48.45 | 0    |
| 22/10/2018 | 15.05 | 25.88 | 57.35 | 46.72 | 39.07 | 40.17 | 51.57 | 48.43 | 0    |
| 23/10/2018 | 15.05 | 25.77 | 55.52 | 46.77 | 39.09 | 40.02 | 51.59 | 48.44 | 0.2  |
| 24/10/2018 | 15.05 | 25.73 | 55.49 | 46.63 | 39.03 | 40.01 | 51.66 | 48.42 | 0    |
| 25/10/2018 | 15.02 | 25.70 | 53.79 | 46.85 | 38.99 | 40.01 | 51.65 | 48.45 | 0    |
| 26/10/2018 | 15.00 | 25.65 | 53.55 | 47.38 | 38.85 | 39.99 | 51.67 | 48.39 | 0    |
| 27/10/2018 | 14.99 | 25.58 | 53.49 | 47.39 | 38.73 | 39.87 | 51.65 | 48.44 | 0    |
| 28/10/2018 | 14.95 | 25.58 | 53.92 | 47.27 | 38.65 | 39.72 | 51.67 | 48.42 | 0    |
| 29/10/2018 | 14.92 | 25.51 | 53.50 | 47.18 | 38.52 | 39.62 | 51.67 | 48.40 | 0    |
| 30/10/2018 | 14.90 | 25.43 | 53.30 | 46.98 | 38.46 | 39.57 | 51.67 | 48.40 | 0    |
| 31/10/2018 | 14.84 | 25.33 | 53.72 | 46.95 | 38.59 | 39.55 | 51.70 | 48.43 | 0    |
| 1/11/2018  | 14.82 | 25.23 | 53.30 | 46.90 | 38.67 | 39.45 | 51.68 | 48.40 | 0.2  |
| 2/11/2018  | 14.80 | 25.19 | 53.22 | 46.81 | 38.58 | 39.33 | 51.72 | 48.41 | 5.6  |
| 3/11/2018  | 14.75 | 28.09 | 53.45 | 46.84 | 38.55 | 39.29 | 51.72 | 48.45 | 23.6 |
| 4/11/2018  | 14.75 | 29.83 | 53.80 | 46.84 | 38.41 | 39.29 | 51.70 | 48.39 | 4.4  |
| 5/11/2018  | 14.76 | 29.16 | 54.72 | 46.74 | 38.34 | 39.09 | 51.75 | 48.43 | 0    |
| 6/11/2018  | 14.78 | 28.47 | 55.13 | 46.73 | 38.30 | 39.00 | 51.76 | 48.46 | 0    |
| 7/11/2018  | 14.81 | 28.04 | 53.97 | 46.78 | 38.02 | 38.86 | 51.74 | 48.39 | 0    |
| 8/11/2018  | 14.81 | 27.92 | 55.23 | 46.88 | 38.51 | 38.95 | 51.67 | 48.48 | 0    |
| 9/11/2018  | 14.83 | 27.78 | 55.21 | 46.84 | 38.54 | 39.04 | 51.76 | 48.40 | 2.6  |
| 10/11/2018 | 14.85 | 27.66 | 53.96 | 46.76 | 38.53 | 38.86 | 51.73 | 48.43 | 1.6  |
| 11/11/2018 | 14.84 | 29.53 | 55.38 | 46.86 | 38.58 | 39.36 | 51.79 | 48.43 | 13.4 |
| 12/11/2018 | 14.86 | 29.35 | 55.01 | 46.80 | 38.51 | 39.61 | 51.78 | 48.50 | 2    |
| 13/11/2018 | 14.90 | 28.97 | 55.58 | 46.80 | 38.56 | 39.52 | 51.82 | 48.39 | 0    |
| 14/11/2018 | 14.90 | 28.56 | 54.96 | 46.71 | 38.44 | 39.39 | 51.79 | 48.48 | 2    |
| 15/11/2018 | 14.95 | 28.23 | 54.78 | 46.74 | 38.52 | 39.34 | 51.78 | 48.40 | 3.2  |

|            |       |       |       |       |       |       |       |       |     |
|------------|-------|-------|-------|-------|-------|-------|-------|-------|-----|
| 16/11/2018 | 14.97 | 28.41 | 53.00 | 47.10 | 40.49 | 41.53 | 51.79 | 48.16 | 0   |
| 17/11/2018 | 15.13 | 28.28 | 53.06 | 46.99 | 40.74 | 41.45 | 51.77 | 48.24 | 0   |
| 18/11/2018 | 15.45 | 28.17 | 52.91 | 46.96 | 40.60 | 41.40 | 51.83 | 48.14 | 0   |
| 19/11/2018 | 15.67 | 28.13 | 52.19 | 46.91 | 40.48 | 41.40 | 51.82 | 48.17 | 0   |
| 20/11/2018 | 15.77 | 28.01 | 52.33 | 46.87 | 40.23 | 41.36 | 51.81 | 48.26 | 0   |
| 21/11/2018 | 15.83 | 27.98 | 52.86 | 46.82 | 40.07 | 41.27 | 51.80 | 48.24 | 0   |
| 22/11/2018 | 15.78 | 27.96 | 52.44 | 46.87 | 40.01 | 41.20 | 51.91 | 48.15 | 1.8 |
| 23/11/2018 | 15.81 | 27.87 | 52.22 | 46.79 | 39.91 | 41.20 | 51.89 | 48.30 | 1.8 |
| 24/11/2018 | 15.79 | 27.93 | 52.00 | 46.83 | 39.71 | 41.11 | 51.97 | 48.24 | 0   |
| 25/11/2018 | 15.77 | 27.94 | 51.93 | 46.94 | 39.53 | 41.00 | 51.96 | 48.19 | 0   |
| 26/11/2018 | 15.73 | 28.03 | 51.64 | 46.87 | 39.35 | 40.85 | 52.02 | 48.19 | 0   |
| 27/11/2018 | 15.72 | 27.85 | 50.82 | 46.81 | 39.19 | 40.74 | 52.01 | 48.22 | 0   |
| 28/11/2018 | 15.72 | 27.48 | 50.28 | 46.66 | 39.00 | 40.69 | 52.01 | 48.21 | 0   |
| 29/11/2018 | 15.70 | 27.44 | 50.53 | 46.71 | 38.83 | 40.68 | 52.02 | 48.29 | 0   |
| 30/11/2018 | 15.55 | 27.40 | 50.64 | 46.65 | 38.69 | 40.66 | 52.01 | 48.34 | 0   |
